# Supplementary material for: Electrochemical tuning of a Cu3P/Ni2P hybrid for a promoted hydrogen evolution reaction
Source: Royal Society of Chemistry journal article supplement (doi:10.1039/d2dt02080g), 2022-01-01
Supplement: d2dt02080g1.pdf [file d2dt02080g1.pdf]

## Support information

### Electrochemical tuning of Cu<sub>3</sub>P/Ni<sub>2</sub>P hybrid towards promoted hydrogen evolution reaction

Jiaqian Guo<sup>a</sup>, Zhenxiang Zhan<sup>a</sup>, Ting Lei<sup>a,1</sup>, Ping Yin<sup>b,2</sup>

<sup>a</sup> State Key Laboratory of Powder Metallurgy, Central South University, Changsha 410083, China

<sup>b</sup> Centre of Stomatology, Xiangya Hospital, Central South University, Changsha 410008, China

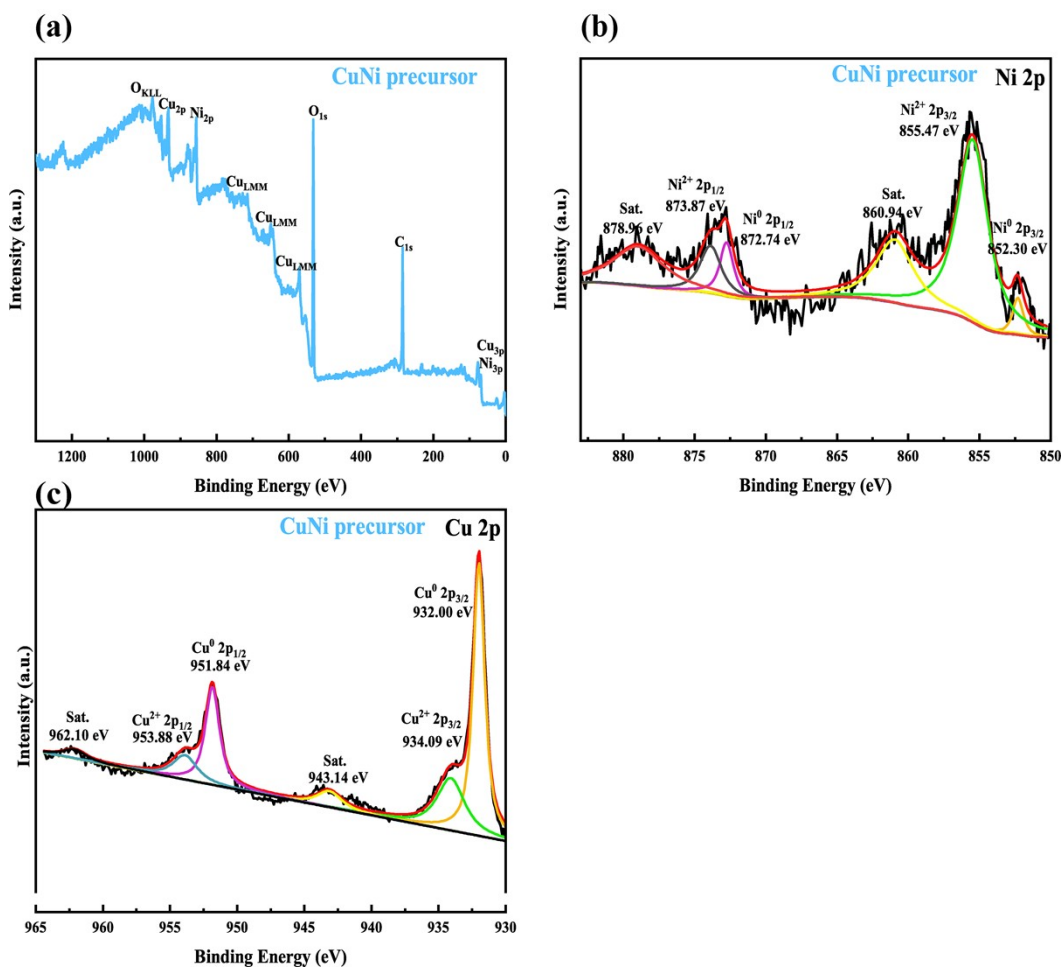

**Figure S1.** XPS spectra of NiCu precursor: (a) Survey spectrum, (b) Ni 2p, (c) Cu 2p and (d) P 2p.

<sup>1</sup>Corresponding author, E-mail, [tlei@mail.csu.edu.cn](mailto:tlei@mail.csu.edu.cn) (T.Lei)

<sup>2</sup>Corresponding author, E-mail, [yinpingoral@163.com](mailto:yinpingoral@163.com) (P. Yin)

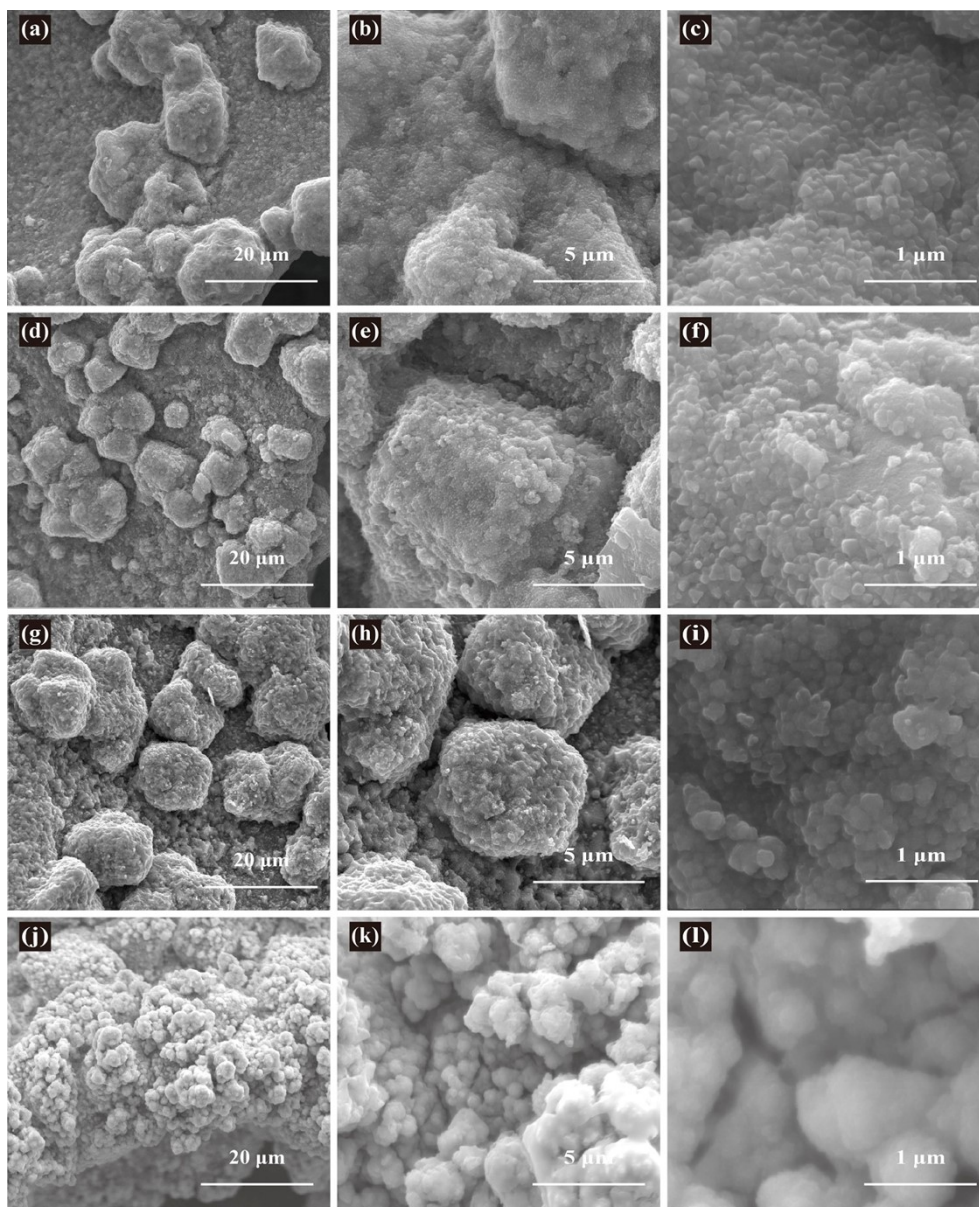

**Figure S2.** SEM images for Cu<sub>3</sub>P/Ni<sub>2</sub>P@NF modified by different CV scans in 0.5 M H<sub>2</sub>SO<sub>4</sub>:

(a-c) Cu<sub>3</sub>P/Ni<sub>2</sub>P@NF-1c, (d-f) Cu<sub>3</sub>P/Ni<sub>2</sub>P@NF-2c, (g-i) Cu<sub>3</sub>P/Ni<sub>2</sub>P@NF-3c and (j-l)

Cu<sub>3</sub>P/Ni<sub>2</sub>P@NF-5c.

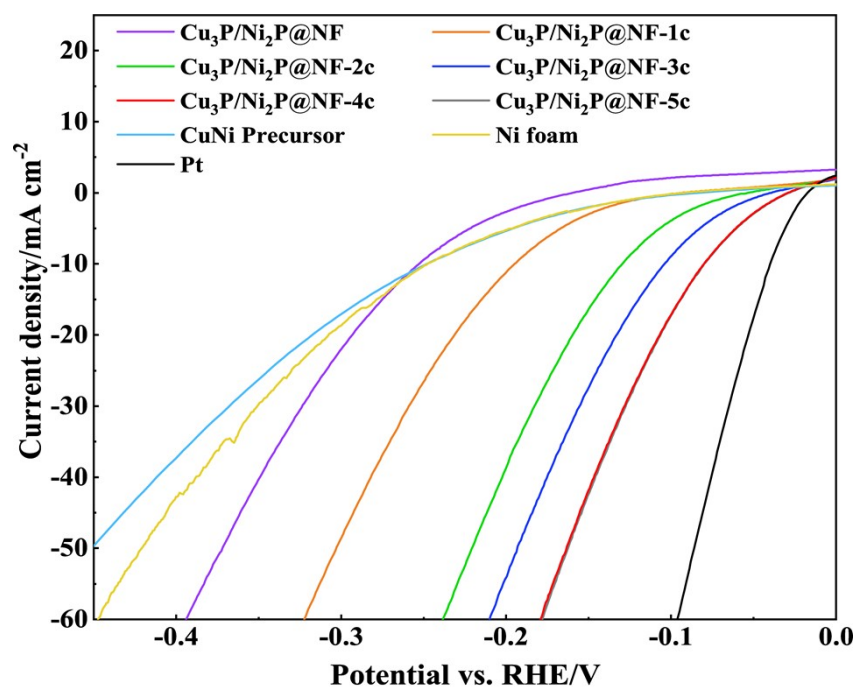

**Figure S3.** (a) Polarization curves without  $iR$  correction of NiCu precursor,  $\text{Cu}_3\text{P}/\text{Ni}_2\text{P}@NF$ , electrochemically modified  $\text{Cu}_3\text{P}/\text{Ni}_2\text{P}@NF$ , Pt and Ni foam in 0.5 M  $\text{H}_2\text{SO}_4$  (scan rate:  $5 \text{ mV s}^{-1}$ );

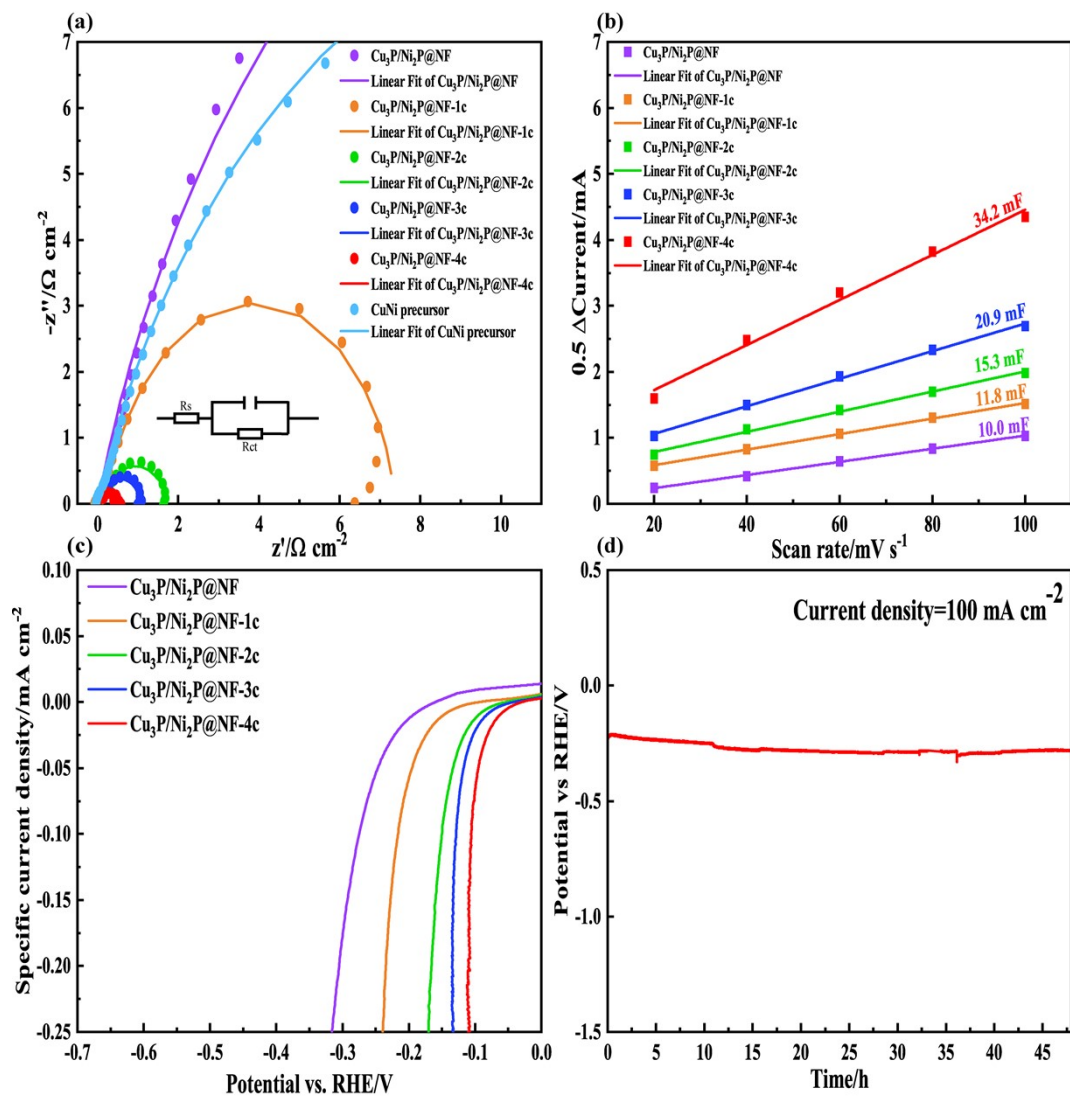

**Figure S4.** (a) Nyquist plots; (b)  $C_{dl}$ ; (c) Polarization curves related to specific current density of  $\text{Cu}_3\text{P}/\text{Ni}_2\text{P}@NF$  and  $\text{Cu}_3\text{P}/\text{Ni}_2\text{P}@NF$  modified by CV scans in  $0.5 \text{ M H}_2\text{SO}_4$ ; (d) chronopotentiometric curve for  $\text{Cu}_3\text{P}/\text{Ni}_2\text{P}@NF-4c$  at  $100 \text{ mA cm}^{-2}$  for 48 h in  $0.5 \text{ M H}_2\text{SO}_4$  without  $iR$  correction.

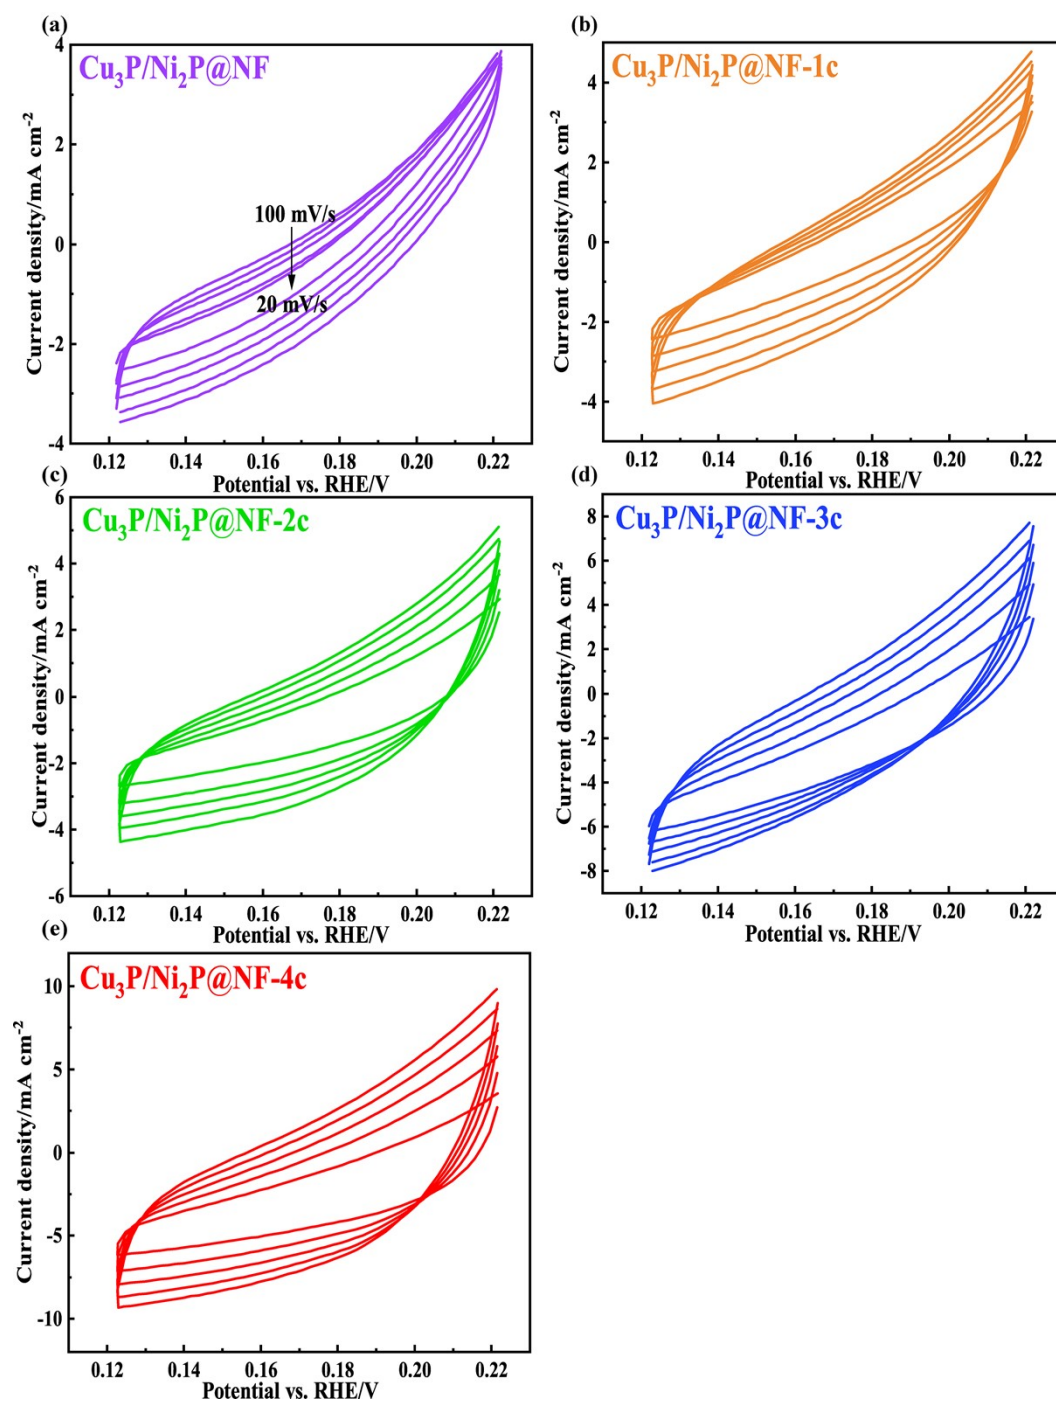

**Figure S5.** CV curves:  $\text{Cu}_3\text{P}/\text{Ni}_2\text{P}@NF$  (a),  $\text{Cu}_3\text{P}/\text{Ni}_2\text{P}@NF-1c$  (b),  $\text{Cu}_3\text{P}/\text{Ni}_2\text{P}@NF-2c$  (c),

$\text{Cu}_3\text{P}/\text{Ni}_2\text{P}@NF-3c$  (d) and  $\text{Cu}_3\text{P}/\text{Ni}_2\text{P}@NF-4c$  (e).



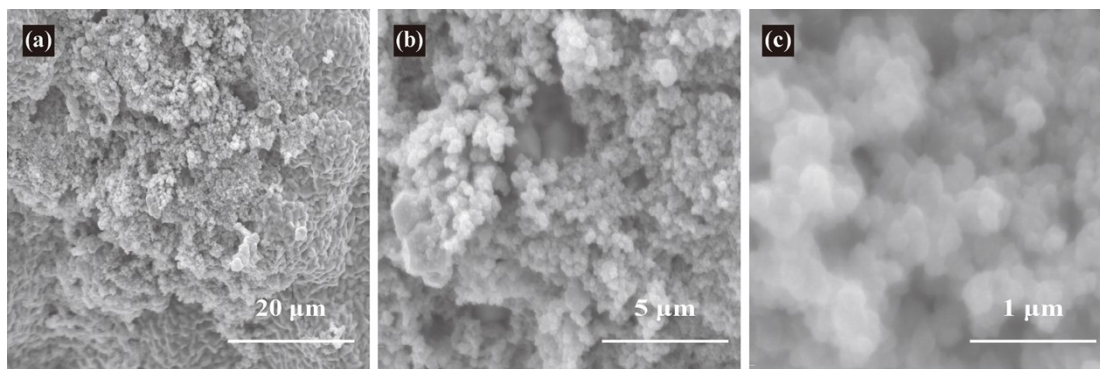

**Figure S6.** SEM images for post-HER  $\text{Cu}_3\text{P}/\text{Ni}_2\text{P}@/\text{NF-4c}$  with different magnifications.

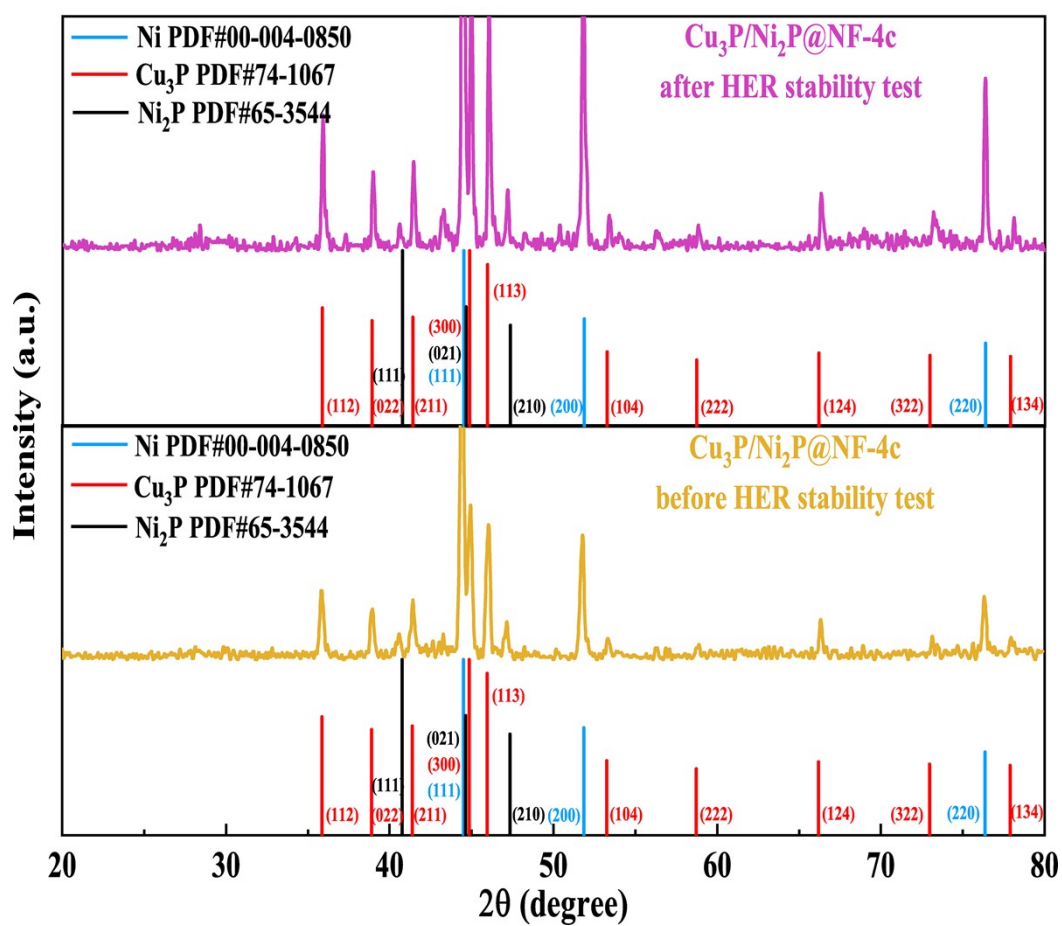

**Figure S7.** XRD patterns for  $\text{Cu}_3\text{P}/\text{Ni}_2\text{P}@/\text{NF-4c}$  and post-HER  $\text{Cu}_3\text{P}/\text{Ni}_2\text{P}@/\text{NF-4c}$ .

**Table S1.** Comparison of the HER performance of  $\text{Cu}_3\text{P}/\text{Ni}_2\text{P}@/\text{NF}$  and electrochemically

modified Cu<sub>3</sub>P/Ni<sub>2</sub>P@NF in 0.5 M H<sub>2</sub>SO<sub>4</sub>.

| Materials                                 | Media                                | $\eta_{10}$<br>(mV) | Tafel slopes<br>(mV·dec <sup>-1</sup> ) | Exchange<br>current<br>density<br>(mA·cm <sup>-2</sup> ) | $R_{ct}$<br>( $\Omega$ ) | $C_{dl}$ (mF) | ECSA<br>(cm <sup>2</sup> ) | $RF$ |
|-------------------------------------------|--------------------------------------|---------------------|-----------------------------------------|----------------------------------------------------------|--------------------------|---------------|----------------------------|------|
| Cu <sub>3</sub> P/Ni <sub>2</sub> P@NF    | 0.5 M H <sub>2</sub> SO <sub>4</sub> | 240                 | 86.7                                    | 0.02                                                     | 33.54                    | 10.0          | 250                        | 250  |
| Cu <sub>3</sub> P/Ni <sub>2</sub> P@NF-1c | 0.5 M H <sub>2</sub> SO <sub>4</sub> | 182                 | 74.9                                    | 0.04                                                     | 7.54                     | 11.8          | 295                        | 295  |
| Cu <sub>3</sub> P/Ni <sub>2</sub> P@NF-2c | 0.5 M H <sub>2</sub> SO <sub>4</sub> | 117                 | 54.8                                    | 0.07                                                     | 1.76                     | 15.3          | 383                        | 383  |
| Cu <sub>3</sub> P/Ni <sub>2</sub> P@NF-3c | 0.5 M H <sub>2</sub> SO <sub>4</sub> | 91                  | 50.9                                    | 0.16                                                     | 1.10                     | 20.9          | 523                        | 523  |
| Cu <sub>3</sub> P/Ni <sub>2</sub> P@NF-4c | 0.5 M H <sub>2</sub> SO <sub>4</sub> | 67                  | 43.9                                    | 0.28                                                     | 0.49                     | 34.2          | 855                        | 855  |

**Table S2.** Comparison of the HER performance of Cu<sub>3</sub>P/Ni<sub>2</sub>P@NF-4c and other HER electrocatalysts.

| Materials                                              | Media                                | $\eta_{10}$ / mV | Tafel slopes (mV·dec <sup>-1</sup> ) | Reference |
|--------------------------------------------------------|--------------------------------------|------------------|--------------------------------------|-----------|
| Ni <sub>2</sub> P-WO <sub>3</sub>                      | 0.5 M H <sub>2</sub> SO <sub>4</sub> | 107              | 55.9                                 | 1         |
| Cu <sub>3</sub> P@NPC-CF                               | 0.5 M H <sub>2</sub> SO <sub>4</sub> | 81.94            | 81.25                                | 2         |
| Cu <sub>2</sub> S-Cu <sub>3</sub> P@C                  | 0.5 M H <sub>2</sub> SO <sub>4</sub> | 85               | 34                                   | 3         |
| Ni <sub>2</sub> P/Ni <sub>3</sub> P <sub>4</sub> @3DNG | 0.5 M H <sub>2</sub> SO <sub>4</sub> | 139              | 59                                   | 4         |
| Ni <sub>12</sub> P <sub>5</sub> -Ni <sub>2</sub> P     | 0.5 M H <sub>2</sub> SO <sub>4</sub> | 166              | 60                                   | 5         |
| Ni <sub>2</sub> P/NF                                   | 0.5 M H <sub>2</sub> SO <sub>4</sub> | 78               | 33                                   | 6         |
| N-C@CoP/Ni <sub>2</sub> P                              | 0.5 M H <sub>2</sub> SO <sub>4</sub> | 153              | 53.01                                | 7         |
| Co <sub>2</sub> P/Ni <sub>2</sub> P/CNT-3              | 0.5 M H <sub>2</sub> SO <sub>4</sub> | 151              | 41.64                                | 8         |
| Ni <sub>2</sub> P/CC                                   | 0.5 M H <sub>2</sub> SO <sub>4</sub> | 119              | 50                                   | 9         |
| Ni <sub>2</sub> P/NF-PECVD                             | 0.5 M H <sub>2</sub> SO <sub>4</sub> | 97               | 79                                   | 10        |
| Ni <sub>2</sub> P/CoP@ NPC                             | 0.5 M H <sub>2</sub> SO <sub>4</sub> | 160              | 57                                   | 11        |

|                                              |                                      |     |      |               |
|----------------------------------------------|--------------------------------------|-----|------|---------------|
| Cu <sub>x</sub> Ni <sub>1-x</sub> P@PC       | 0.5 M H <sub>2</sub> SO <sub>4</sub> | 102 | 85.8 | <sup>12</sup> |
| Cu <sub>3</sub> P/Ni <sub>2</sub> P@NF 4000c | 0.5 M H <sub>2</sub> SO <sub>4</sub> | 67  | 43.9 | This work     |

## References:

1. B. Wang, L. Wang, Y. Qian, Y. Yang, T. T. Isimjan and X. Yang, *Sustain. Energy Fuels*, 2021, **5**, 2884-2892.
2. E. Jiang, J. Jiang, G. Huang, Z. Pan, X. Chen, G. Wang, S. Ma, J. Zhu and P. K. Shen, *Sustain. Energy Fuels*, 2021, **5**, 2451-2457.
3. F. Xu, C. Yu, G. Qian, L. Luo, S. W. Hasan, S. Yin and P. Tsiakaras, *Renew. Energ.*, 2020, **151**, 1278-1285.
4. G. Ding, Y. Zhang, J. Dong and L. Xu, *Mater. Lett.*, 2021, **299**, 130071.
5. H. Shi, Q. Yu, G. Liu and X. Hu, *Int. J. Hydrogen Energy*, 2021, **46**, 17097-17105.
6. S. Huo, S. Yang, Q. Niu, Z. Song, F. Yang and L. Song, *ChemCatChem*, 2020, **12**, 4600-4610.
7. T. Feng, F. Wang, Y. Xu, M. Chang, X. Jin, z. Yulin, J. Piao and J. Lei, *Int. J. Hydrogen Energy*, 2021, **46**, 8431-8443.
8. Z. Ding, H. Yu, X. Liu, N. He, X. Chen, H. Li, M. Wang, Y. Yamauchi, X. Xu, M. A. Amin, T. Lu and L. Pan, *J. Colloid Interface Sci.*, 2022, **616**, 210-220.
9. S. Huo, S. Yang, Q. Niu, F. Yang and L. Song, *Int. J. Hydrogen Energy*, 2020, **45**, 4015-4025.
10. M. J. Sun, Z. Y. Zhang, Z. Wang, S. J. Wang, S. Y. Zhang, R. T. Wang and X. C. Song, *Int. J. Electrochem. Sci.*, 2020, **15**, 9734-9745.
11. Y. Xu, R. Wang, Y. Zheng, L. Zhang, T. Jiao, Q. Peng and Z. Liu, *Appl. Surf. Sci.*, 2020, **509**, 145383.
12. B. Qu, M. L. Wei, X. T. Lu and J. K. Zhu, *ChemistrySelect*, 2021, **6**, 12926-12933.
